1 **Authors:**

2 \*Zequan Wang, PhD, RN<sup>1</sup>

3 Sangchoon JEON, PhD<sup>2</sup>

4 Christine TOCCHI, PhD, APRN, BC-GNP<sup>1</sup>

5 Samantha CONLEY, PhD, RN<sup>3</sup>

6 Stephen WALSH, ScD<sup>1,4</sup>

7 Kyounghae KIM, PhD, RN<sup>5,6,7</sup>

8 Deborah CHYUN, PhD, RN, FAHA, FAAN<sup>1</sup>

9 Nancy Schmieder REDEKER, PhD, RN, FAHA, FAAN<sup>1</sup>

10

11

12 1 University of Connecticut School of Nursing, Storrs, Connecticut

13 2 Yale School of Nursing, Orange, Connecticut

14 3 Mayo Clinic, Rochester, Minnesota

15 4 University of Connecticut School of Medicine, Storrs, Connecticut

16 5 College of Nursing, Korea University, Seoul, South Korea

17 6 Institute of Nursing Research, Korea University, Seoul, South Korea

18 7 Transdisciplinary Major in Learning Health Systems, Department of Healthcare Sciences,

19 Graduate School, Korea University, Seoul, South Korea

20

21 \*Correspondence should be sent to

22 Zequan Wang, PhD, RN

23 University of Connecticut School of Nursing, Storrs, Connecticut

24 231 Glenbrook Rd, Unit 4026

25 Email: [zequan.wang@uconn.edu](mailto:zequan.wang@uconn.edu)

26 Telephone: 1-734-709-5042

27

28

29 **Symptom Cluster Profiles among Community-residing Older Adults with Heart Failure:**  
30 **Findings from the U.S. Health and Retirement Study**

31 **ABSTRACT**

32  
33 **Background:** The incidence of heart failure (HF) rises significantly as people age due to the  
34 accumulated influence of risk factors in cardiovascular structure and function. Among older  
35 adults with HF, symptoms are manifested in clustered symptoms. Few studies have addressed  
36 symptoms specifically in older adults with HF and most have been conducted with small samples.  
37 The aims of this study were to (1) describe symptom cluster profiles in older adults with HF in a  
38 nationally representative sample of community-dwelling older adults; and (2) determine the  
39 associations between demographic and clinical characteristics and membership in symptom  
40 cluster profiles.

41 **Methods:** A secondary analysis was conducted using data from the Health and Retirement Study.  
42 Fatigue, shortness of breath, pain, swelling, depressive symptoms, and dizziness were measured.  
43 Latent class analysis was used to identify symptom cluster profiles. Bivariate associations and  
44 multinomial logistic regression were used to determine the associations between symptom  
45 cluster profiles and demographic and clinical characteristics.

46 **Results:** The sample included 690 participants. Three symptom cluster profiles were identified  
47 [high-burden, low-burden, and cardiopulmonary-depressive]. Age, gender, BMI, marital status,  
48 alcohol consumption, diabetes, lung disease, and arthritis were significantly different across the  
49 three profiles. People in the high-burden and cardiopulmonary-depressive profiles, compared to  
50 those in low-burden, had higher odds of having lung disease and arthritis, yet lower odds of  
51 higher alcohol consumption.

52 **Conclusions:** Older adults with HF residing in the community experienced distinct symptom  
53 cluster profiles. Research is needed to identify and test targeted interventions for specific  
54 symptom cluster profiles.

55 **Keywords:** Older adults, community-residing, heart failure, symptom cluster profiles

56

57

58

## 59 **BACKGROUND**

60 Heart failure (HF) is a complex clinical syndrome experienced by approximately 26 million  
61 adults throughout the world.<sup>1</sup> The prevalence of HF increases sharply with age due to age-  
62 associated changes in cardiovascular structure and function,<sup>2</sup> and the prevalence of HF among  
63 adults aged 60 to 79 years ranges from 4.8% to 6.6%, and it increases to 10.6% to 13.5% for  
64 adults aged 80 years and older.<sup>3</sup> Fatigue, shortness of breath/dyspnea,<sup>3</sup> pain, depressive  
65 symptoms, and insomnia symptoms are common among older adults<sup>4-6</sup> and these symptoms are  
66 often associated with advanced age and multimorbidity. These symptoms may also contribute to  
67 poor quality of life and function and difficulty with self-care.<sup>7</sup>

68 Adults with HF demonstrate heterogeneous symptom experiences as evidenced by  
69 variations in symptom cluster profiles.<sup>5,8</sup> While numerous studies addressed isolated symptoms,  
70 better understanding of the nature of symptoms and how they co-occur is essential to guide  
71 interventions.<sup>8</sup> Symptom profiles encompass physical and psychological (emotional) domains  
72 that may differ depending on the demographic and clinical attributes of the participants.<sup>5,9,10</sup>

73 Previous studies have indicated that symptoms among adults with HF (age  $\geq$  18 years)  
74 recruited from hospital wards,<sup>11</sup> outpatient HF clinics,<sup>9,12-16</sup> and healthcare centers,<sup>17</sup> occur in  
75 clusters or cluster profiles. However, these studies were conducted in specific regions, lacked  
76 national representation, and had limited generalizability due to their small sample sizes. Limited  
77 studies have been conducted with older adults from a national-wide population, which often  
78 provides insights into the comprehensive real-world symptom experience of older adults with HF.  
79 Addressing symptom cluster profiles among older adults with a large sample size can help  
80 address the unique challenges in managing and preventing HF in an aging population. This

81 includes identifying risk factors and early symptoms/signs of HF, enabling preventive strategies,  
82 and ultimately improving the quality of life and adverse outcomes.

83 The aims of this study are to (1) describe symptom cluster profiles in older adults with  
84 HF in a nationally representative sample of community-dwelling older adults in the USA; and (2)  
85 determine the associations between demographics, clinical characteristics, and membership in  
86 symptom cluster profiles.

## 87 **METHODS**

### 88 **Design**

89 This study was a cross-sectional study of data obtained from the Health and Retirement  
90 Study (HRS), conducted by the Institute for Social Research at the University of Michigan. The  
91 HRS is a nationally representative longitudinal study of individuals over the age of 50 years,<sup>18</sup>  
92 designed to understand aging at the population level for community-residing,  
93 noninstitutionalized adults. Compared to other waves, the HRS 2008 wave included more  
94 participants with HF who had subsequent longitudinal data and so, was used as the baseline. This  
95 study used de-identified, publicly available data and was deemed exempt from the Institutional  
96 Review Board approval of the University of Connecticut.

### 97 **Participants and Sample**

98 Participants from the HRS dataset were considered eligible if they resided in the  
99 community and were identified as having HF (C048) and comorbid conditions based on the  
100 chronic condition codes found in the claims data. We included participants who reported at least  
101 one of the following symptoms: (fatigue, pain, shortness of breath, depressive symptoms, and  
102 dizziness). We excluded participants who did not report at least one symptom. Participants

103 provided written informed consent prior to the session and verbally agreed to participate in each  
104 interview (Health and Retirement Study, 2008c).

### 105 **Variables and Measures**

106 The health conditions of participants were evaluated using self-reported health measures  
107 in the HRS, and previous studies have confirmed their accuracy and consistency.<sup>18</sup>

108 Age, gender, race, body mass index (BMI), marital status, educational level, veteran  
109 status, smoking status, and alcohol consumption were elicited from the database. The  
110 participants' self-reported age in years was incorporated into the analysis as a continuous  
111 variable, while gender was represented by numerical coding: male (1) and female (0). Self-  
112 reported weight in pounds and height in inches were converted into kilograms and meters,  
113 respectively, to compute BMI in kg/m<sup>2</sup>. BMI was coded and categorized as <18.5 (underweight),  
114 18.5-24.9 (normal weight), 25-29.9 (overweight), 30.0-39.9 (obesity), ≥40.0 (morbid obesity).<sup>19</sup>

115 Alcohol consumption was defined as “Do you ever drink any alcoholic beverages such as beer,  
116 wine, or liquor?”. Participants who answered “yes” were then asked about the number of days  
117 per week for alcohol consumption, the number of drinks per day, and how many days they had  
118 four or more drinks on occasion (binge drinking). Comorbidities, including hypertension,  
119 diabetes, cancer, lung disease, and arthritis, were obtained from the Health Condition  
120 questionnaire.

121 Shortness of breath, persistent swelling in the feet or ankles, fatigue/exhaustion, and  
122 dizziness were evaluated during interviews conducted as part of the core surveys.<sup>18</sup> The response  
123 options for each symptom were “yes”, “no”, and “don't know.” People who answered “yes” were  
124 defined by the investigators as experiencing symptoms. Participants were asked about pain, “Are  
125 you often troubled with pain?” and participants who answered yes were then asked about pain

126 intensity “How bad is the pain most of the time: mild, moderate, or severe?” Participants who  
127 answered yes to the first question and rated the pain as moderate or severe were classified as  
128 having significant pain.<sup>20</sup> These symptoms were selected because they are highly relevant and  
129 specific to people with HF.<sup>9,11,21</sup>

130 HRS investigators assessed depressive symptoms using a short-form eight-item Center  
131 for Epidemiological Studies Depression Scale (CES-D). This scale asked participants to indicate  
132 the frequency with which they encountered depression-related symptoms in the previous week,  
133 with a range of 0-8, and a cutoff point of 4 or more was used to classify depressive symptoms.<sup>22</sup>  
134 The cutoff point for short-form CES-D was determined by HRS, aligning with the established  
135 cutoff on the full CES-D.<sup>22</sup> The short-form CES-D and the original CES-D exhibit comparable  
136 symptom dimensions, and the shorter version of CES-D demonstrates strong validity and internal  
137 reliability with a Cronbach’s alpha of 0.83.

### 138 **Statistical Analysis**

139 Multiple HRS data files were downloaded from the HRS website and cleaned in SAS  
140 (v9.4, Cary, NC, 2020). Personal numbers and household numbers were used to identify  
141 participants in the 2008 core surveys. Missing values were imputed according to observed items  
142 using PROC MI with the EM-algorithm. The study variables were summarized for participants  
143 as means  $\pm$  standard deviations for continuous variables and proportions for categorical variables.

144 The Phi correlation coefficient was used to determine the strength and direction of the  
145 association between symptoms.

146 This study used latent class analysis (LCA), a method that categories individuals into  
147 subgroups based on similar symptom experiences among people with HF, utilizing patterns in  
148 categorical data.<sup>23</sup> This person-centered clustering technique helps in identifying distinct groups

149 within the HF population. LCA, as a data-driven approach, does not require any prior hypotheses,  
150 and a minimum of 100 participants is needed for a well-identified model.<sup>24</sup>

151 We performed LCA with the symptoms of fatigue, pain, shortness of breath, swelling,  
152 depressive symptoms, and dizziness. The final model was determined based on the relative  
153 model fit, including likelihood ratio  $G^2$ , Akaike information criterion (AIC), Bayesian  
154 information criteria (BIC), calculated Akaike information criterion (CAIC), and the adjusted BIC.  
155 For the fit statistics, the favorable model was based on the lowest AIC and BIC, however, the  
156 selection of the final model should depend on fit statistics, clinical interpretability, and the size of  
157 each profile. We utilized the PROC LCA (Version 1.3.0) for SAS, developed by the Penn State  
158 Methodology Center.<sup>25</sup> PROC LCA employs a full-information maximum likelihood method to  
159 manage missing data and determines symptom cluster profile memberships for participants who  
160 lack symptom data.

161 Chi-square tests and analysis of variance (ANOVA) were conducted to examine the  
162 differences in demographic and clinical factors across identified symptom cluster profiles. We  
163 examined the residuals for normal distribution in the ANOVA and adjusted for any skewness in  
164 the distribution of residuals by applying logarithmic transformation to the variables. Additionally,  
165 to understand how demographic and clinical features varied across different symptom cluster  
166 profiles, we employed multinomial logistic regression to develop a model. We developed a  
167 parsimonious model using stepwise selection of variables that had significant bivariate  
168 association with the symptom cluster profiles. Statistical significance was designated as  $p < .05$ .

## 169 **RESULTS**

### 170 **Demographic and Clinical Characteristics**



171 Table 1 reports the demographic and clinical characteristics of the participants. The  
172 sample included 690 individuals [mean age = 74.9 (SD 10.0) years]. Over half of the sample was  
173 female (n=390, 56.6%) and a large majority identified as White (n=551, 79.8%). Veterans  
174 represented 26.1% of the total sample. The symptom most commonly reported was shortness of  
175 breath (n=419, 60.7%), while dizziness was noted as the least frequent symptom (n=213, 30.9%).  
176 Table 2 presents the frequency of the symptom and bivariate correlations between the symptoms.  
177 All symptoms were correlated with each other (Phi coefficient=0.15-0.34,  $p < .001$ ).

### 178 **Model Fit Statistics and Membership of Symptom Cluster Profiles**

179 The symptom cluster profiles were best represented by a 3-class model in the LCA  
180 because it was parsimonious and presented better profile separation than other classifications.  
181 This model exhibited the lowest values in AIC, BIC, cAIC, Adjusted BIC, and it presented a  
182 more clinically coherent rationale compared to the 4-class LCA model (Table 3). As reported in  
183 Table 4, profile 1 (N=206, 29.9% of the sample) was comprised of “high-burden” symptoms.  
184 Participants in the high-burden symptom cluster profile had a high probability of experiencing  
185 pain, swelling, shortness of breath, fatigue, depressive symptoms, and dizziness (probabilities  
186 ranged from 0.68 to 0.88). Participants in profile 2 (N=117, 17.0% of the sample) had a low  
187 probability of experiencing symptoms, and the probability of experiencing symptoms in this  
188 “low-burden” profile ranged from 0.00 to 0.38. Participants in profile 3 were comprised of a  
189 “cardiopulmonary-depressive” symptom cluster profile. The probability of experiencing  
190 symptoms in the cardiopulmonary-depressive symptom cluster profile ranged from 0.00 (pain,  
191 dizziness) to 1.00 (shortness of breath).

192 Figure 1 illustrates the profiles of symptom cluster profiles for the 3-class LCA model.  
193 The y-axis represents the probability of symptoms, while the x-axis shows indicator variables

194 used for the LCA model. The three lines represent symptom patterns for the three symptom  
195 cluster profiles. Crossing was observed among the three lines, suggesting that the exhibited  
196 symptoms in older adults with HF are likely associated with more than one cluster profile.

### 197 **Bivariate Analysis and Multinomial Logistic Regression of Symptom Cluster Profiles**

198 We also examined the differences in participants' demographic and clinical characteristics  
199 across the three symptom cluster profiles (Table 5). Age, gender, BMI, marital status, veteran  
200 status, alcohol consumption, diabetes, lung disease, and arthritis had statistically significant  
201 differences across three symptom cluster profiles ( $p < .05$ ). Participants in profile 3  
202 (cardiopulmonary-depressive) were the oldest (76.4 years  $\pm$  10.0) and were more likely to be  
203 married or partnered (48.0%), to be veterans (27.5%), and to be male (46.3%), compared to those  
204 in profile 1 (high-burden) and 2 (low-burden). Most participants in the high-burden profile were  
205 overweight (25.7%), obese (36.4%), or morbidly obese (14.6%). Over one-quarter of participants  
206 in the cardiopulmonary-depressive profile were overweight (25.9%) or obese (28.3%).

207 Almost one-quarter of participants in the cardiopulmonary-depressive profile had a  
208 history of alcohol consumption (24.3%). The average days/week of alcohol consumption per  
209 week (2.3 days  $\pm$  2.7) was higher compared to profiles 1 and 2. Participants in the  
210 cardiopulmonary-depressive profile were more likely to report hypertension (82.0%), diabetes  
211 (55.8%), and arthritis (77.9%). However, having lung disease was the most common in  
212 participants in the high-burden symptom cluster profile (53.4%).

213 Table 6 presents the results of the multinomial logistic regression. People in profile 1  
214 (high-burden) and profile 3 (cardiopulmonary-depressive), compared to those in profile 2 (low-  
215 burden), had higher odds of having lung disease and arthritis ( $p < .001$ ). People in the high-

216 burden and cardiopulmonary-depressive symptom cluster profiles were less likely to consume  
217 more alcohol compared to those in the low-burden profile ( $p < .001$ ).

## 218 **DISCUSSION**

219 To our knowledge, this is the first study that evaluated associations between demographic  
220 and clinical factors and symptom cluster profiles in a nationally representative sample of  
221 community-residing older adults with HF. It extends previous symptom cluster studies that  
222 included more geographically localized samples recruited from health care centers and had  
223 smaller samples. Two of the identified symptom cluster profiles (high-burden and low-burden),  
224 are characterized by either consistently high or low physical and psychological symptoms and  
225 are consistent with the symptom cluster profiles identified in previous studies.<sup>5,9,26</sup> However, the  
226 membership in the high-burden and low-burden profiles varies depending on which symptoms  
227 were selected. In our study, most participants (53.2%) belonged to the cardiopulmonary-  
228 depressive symptom cluster profile, which is similar to those reported in the literature that found  
229 integrated physical and psychological symptoms in patients with HF.<sup>11,17,27</sup>

230 Compared with the low-burden symptom cluster profile, it is not surprising that  
231 comorbidity was associated with membership in the high-burden and cardiopulmonary-  
232 depressive symptom cluster profiles. Notably, we found that the risk of lung disease for high-  
233 burden symptom cluster profiles is about 5 times higher than that of low-burden symptom cluster  
234 profiles. Therefore, assessing CRP and fibrinogen would add additional insight into the risk of  
235 lung disease among those with severe HF. Elevated inflammatory markers, such as C-reactive  
236 protein (CRP) and fibrinogen, perhaps are the most prominently cited risk factors to explain the  
237 associations between severe HF and pulmonary dysfunction.<sup>28</sup> In addition to lung disease and  
238 arthritis, previous studies have also found an association between diabetes and emotional

239 symptom cluster (depressed, worry, difficult concentration) in patients with HF.<sup>29</sup> Hypertension,  
240 atrial fibrillation, and diabetes were significant predictors of being in the high distress profile  
241 (severe physical and psychological symptoms) compared to the low distress profile.<sup>9</sup> HF,  
242 especially HF preserved ejection fraction (HFpEF), is associated with a high prevalence of  
243 comorbidities.<sup>30</sup> Conditions, such as hypertension (65%), atrial fibrillation (45%), diabetes (40%),  
244 and chronic obstructive pulmonary disease (40%), are commonly observed in older adults with  
245 HF. These comorbidities, in turn, exacerbate the progression and clinical presentation of HF,  
246 forming a vicious cycle. The reciprocal relationships can be particularly challenging among older  
247 adults and are considered a true geriatric syndrome.<sup>30</sup> Age-related changes and cumulative  
248 comorbidities can be a challenge for older adults to distinguish whether symptoms are arising  
249 from HF itself or from its comorbidities.<sup>31</sup>

250         The prevalence of depressive symptoms was quite pronounced. Depressive symptoms  
251 were also manifest in two distinct symptom cluster profiles. This may be because veterans  
252 represented over a quarter of the total participants, and over half of these veterans were  
253 categorized within the cardiovascular-depressive symptom cluster profile. Deployed military  
254 personnel were twice as likely to suffer depression than non-deployed military personnel.<sup>32</sup>  
255 However, previous HRS studies have shown that veterans and non-veterans had a comparable  
256 prevalence of depression and anxiety symptoms, and these emotional symptoms vary among  
257 veteran cohorts.<sup>33</sup> Veterans have reported a reluctance to seek care for fear of stigma and  
258 negative consequences, which could result in fear of admissions of depressive symptoms among  
259 this population.<sup>34</sup> Given the high prevalence and intricate nature of depressive symptoms among  
260 community-residing older adults with HF, particularly veterans, it is crucial for clinicians and

261 health care providers to prioritize the assessment and management of depression and its  
262 symptoms.

263 Older adults with HF who consume alcohol were less likely to belong to high-burden and  
264 cardiopulmonary-depressive symptom cluster profiles. One reason might be that older people  
265 with high-burden or cardiopulmonary-related symptoms are more aware of the severity of their  
266 condition and the impact of alcohol on their daily lives and were following medical advice to  
267 avoid alcohol consumption. This may also be attributed to several considerations, such as  
268 physiological effects, lifestyle modifications, symptom burden awareness, and patient  
269 education.<sup>35</sup> Consequently, they may be more motivated to adopt lifestyle modifications and  
270 prioritize medication/lifestyle adherence, such as limiting alcohol intake, to alleviate  
271 symptoms.<sup>35,36</sup> Additionally, current evidence shows that low amounts of alcohol consumption  
272 are safe and beneficial for the cardiovascular system.<sup>36</sup> However, alcohol consumption can lead  
273 to either an elevated or reduced cardiovascular risk, depending on the amount consumed,  
274 frequency of drinking, and the pattern of consumption, whether it involves heavy/binge drinking  
275 or irregular intake.<sup>37</sup>

276 It is important to note that these findings are nuanced and not uniform across all symptom  
277 profiles. Though our limited sample size prevented us from finding statistically significant  
278 results regarding drinking frequency and consumption patterns across different symptom cluster  
279 profiles, we did observe that, among older adults with HF who consumed alcohol, those in the  
280 cardiopulmonary-depressive profile consumed alcohol more frequently per week. Meanwhile,  
281 individuals in the high-burden profile showed a higher tendency for binge drinking compared to  
282 other groups. Even though the percentage of individuals with alcohol consumption in the high-  
283 burden profile is relatively lower, their average number of drinks per day and frequency of binge

284 drink is much higher, indicating they tend to engage in heavier alcohol use compared to other  
285 profiles. The possible reason that alcohol might exacerbate high-burden or cardiopulmonary-  
286 depressive symptoms may stem from a combination of direct and indirect physiological effects.  
287 These effects increase the risk of dilated cardiomyopathy, elevated blood pressures, interference  
288 with medications, promoting fluid retention, triggering cardiac arrhythmias and mitochondrial  
289 dysfunction in circulation.<sup>38</sup>

290 Both physical and psychological/emotional aspects of HF can be addressed through a  
291 combination of medication, psychotherapy, and lifestyle changes.<sup>39</sup> This may help healthcare  
292 providers identify the specific symptom cluster profiles that are most affected by depressive  
293 symptoms and tailor the treatment accordingly. Several interventions that combine symptom  
294 management support and self-care management can assist people with HF in recognizing,  
295 responding to, and managing multiple symptoms.<sup>40</sup> Home-based inspiratory muscle training  
296 (IMT) has been found to be a safe, flexible, and adjuvant treatment of pharmacological  
297 interventions in reducing fatigue and dyspnea in patients with HF.<sup>41</sup> Motivational interviewing  
298 (face-to-face sessions plus telephone calls) is another effective strategy to reduce discomfort,  
299 dyspnea, and early and subtle edema in patients with HF.<sup>42</sup> Few interventions have intentionally  
300 targeted symptom clusters/profiles in people with HF. Future studies should consider developing  
301 and examining the effectiveness of interventions aimed at reducing the incidence of specific  
302 symptom clusters/profiles for older adults with HF. Cognitive training combined with exercise,  
303 self-care, and electrical muscle stimulation may be effective as a non-pharmacological  
304 intervention for older adults with HF.<sup>43</sup>

305 The strength of this study is its large sample size which helps gain insights of symptom  
306 cluster profiles among community-residing older adults. Instead of directly assigning people to

307 specific profiles, this study used probabilistic class assignments, allowing for a better evaluation  
308 of differences between profiles and the impact of predictive factors on profile assignments.  
309 Nevertheless, this study had several potential limitations. Firstly, its cross-sectional nature  
310 precludes drawing conclusions on causality and weakens the dynamic analysis of how  
311 demographic and clinical factors influence symptom cluster profiles in older adults. Secondly,  
312 some symptoms, such as shortness of breath and fatigue, were identified using one single  
313 question from self-reported surveys, which may affect the accuracy and validity of the results.  
314 Due to limited data in the HRS, sleep or insomnia symptoms were not included. However, most  
315 people with HF report poor sleep, and 50% report insomnia symptoms, including difficulty  
316 initiating sleep, maintaining sleep, or awakening too early in the morning.<sup>44</sup> Lastly, the limited  
317 diversity in race and ethnicity, combined with limited clinical data (e.g., New York Heart Class),  
318 might impact the accurate characterization of symptoms.

319 HF clinicians should carefully evaluate older adults with HF who reside in communities  
320 for the presence of multiple co-occurring symptoms. It is especially important to assess and  
321 manage depressive symptoms among veterans as these symptoms may present within high-  
322 burden and cardiovascular-depressive symptom cluster profiles. Clinicians and health care  
323 providers should also educate older adults with HF, particularly those experiencing low-burden  
324 symptoms, about the risks associated with alcohol consumption and the potential negative  
325 consequences. Symptoms may change and deterioration can occur in later life, and various risk  
326 factors may be associated with dynamic symptom trajectory among this vulnerable population.  
327 Future research is needed to determine the longitudinal trajectory of symptom cluster profiles  
328 and examine the extent to which risk factors can predict changes in symptom cluster membership.  
329

330 **CONCLUSIONS**

331 In conclusion, among community-residing older adults with HF, we identified three  
332 distinct symptom cluster profiles: high-burden, low-burden, and integrative physical and  
333 emotional symptom cluster profiles. Lung disease and arthritis are associated with the high-  
334 burden symptom cluster profiles, while alcohol consumption is associated with the low-burden  
335 symptom cluster profiles. There is a need to examine these symptom cluster profiles  
336 longitudinally and pinpoint older adults at risk for adverse outcomes. Targeted symptom cluster  
337 profile intervention should also be explored.

338



339 **List of abbreviations**

340 HF: Heart failure

341 HRS: Health and retirement study

342 BMI: Body mass index

343 CES-D: Center for Epidemiological Studies Depression Scale

344 LCA: latent class analysis

345 AIC: Akaike information criterion

346 BIC: Bayesian information criteria

347 CAIC: calculated Akaike information criterion

348 ANOVA: Analysis of variance

349 HFpEF: HF preserved ejection fraction

350 **Acknowledgements**

351 Not applicable

352 **Author contributions**

353 Z.W. designed the study and drafted the manuscript. Z.W., S.J., N.S.R., and S.W. contributed to  
354 the methodology. Z.W. performed statistical analyses. All authors contributed to the  
355 interpretation of the results and read and approved the final manuscript.

356 **Funding Information**

357 No specific funding was received for this work

358 **Data Availability**

359 The datasets generated and/or analyzed in this current study are available from the U.S Health  
360 and Retirement Study (<https://hrs.isr.umich.edu/about>)

361

362

363 **Declarations**

364 **Ethics approval and consent to participate**

365 This study used de-identified, publicly available data and was deemed exempt from the  
366 Institutional Review Board approval of the University of Connecticut. Participants provided  
367 written informed consent prior to the session and verbally agreed to participate in each interview  
368 (Health and Retirement Study, 2008c).

369 **Consent for publication**

370 No applicable.

371 **Competing interests**

372 None

373

374

375 **REFERENCES**

- 376 1. Virani SS, Alonso A, Aparicio HJ, et al. Heart Disease and Stroke Statistics—2021  
377 Update: A Report From the American Heart Association. *Wolters Kluwer Health*  
378 2021;143. doi:10.1161/cir.0000000000000950
- 379 2. Dharmarajan K, Rich MW. Epidemiology, Pathophysiology, and Prognosis of Heart  
380 Failure in Older Adults. *Heart Fail Clin.* 2017;13(3):417-426.  
381 doi:10.1016/j.hfc.2017.02.001
- 382 3. Benjamin EJ, Blaha MJ, Chiuve SE, et al. Correction to: Heart Disease and Stroke  
383 Statistics-2017 Update: A Report From the American Heart Association. *Circulation.*  
384 2017;136(10):e196. doi:10.1161/CIR.0000000000000530
- 385 4. Chen J, Wang Z, Starkweather A, et al. Pain sensation and gut microbiota profiles in older  
386 adults with heart failure. *Interdiscip Nurs Res.* 2023;2(2).
- 387 5. Conley S, Jeon S, Breazeale S, et al. Symptom Cluster Profiles Among Adults with  
388 Insomnia and Heart Failure. *Behav Sleep Med.* April 2022:1-12.  
389 doi:10.1080/15402002.2022.2060226
- 390 6. Yu F, Li C, Chong K. Symptom cluster among patients with advanced heart failure: A  
391 review of its manifestations and impacts on health outcomes. *Curr Opin Support Palliat*  
392 *Care.* 2018;12(1):16-24. doi:10.1097/SPC.0000000000000316
- 393 7. Butrous H, Hummel SL. Heart Failure in Older Adults. *Can J Cardiol.* 2016;32(9):1140-  
394 1147. doi:10.1016/j.cjca.2016.05.005
- 395 8. Wang Z, Conley S, Redeker NS, Tocchi C. An Evolutionary Concept Analysis in People  
396 With Heart Failure-Symptom Clusters or Symptom Cluster Profiles? *ANS Adv Nurs Sci.*  
397 2023. doi:10.1097/ANS.0000000000000495 [Epub ahead of print]

- 398 9. Park J, Moser DK, Griffith K, Haring JR, Johantgen M. Exploring Symptom Clusters in  
399 People With Heart Failure. *Clin Nurs Res*. 2019;28(2):165-181.  
400 doi:10.1177/1054773817729606
- 401 10. Song EK, Moser DK, Rayens MK, Lennie TA. Symptom Clusters Predict Event-Free  
402 Survival in Patients With Heart Failure. *J Cardiovasc Nurs*. 2010;25(4):284-291.
- 403 11. Yu DS, Chan HY, Leung DY, Hui E, Sit JW. Symptom clusters and quality of life among  
404 patients with advanced heart failure. *J Geriatr Cardiol*. 2016;13(5):408-414.  
405 doi:10.11909/j.issn.1671-5411.2016.05.014
- 406 12. Hertzog MA, Pozehl B, Duncan K. Cluster analysis of symptom occurrence to identify  
407 subgroups of heart failure patients: A pilot study. *J Cardiovasc Nurs*. 2010;25(4):273-283.  
408 doi:10.1097/JCN.0b013e3181cfbb6c
- 409 13. Huang TY, Moser DK, Hwang SL. Identification, Associated Factors, and Prognosis of  
410 Symptom Clusters in Taiwanese Patients With Heart Failure. *J Nurs Res*. 2018;26(1):60-  
411 67. doi:10.1097/JNR.0000000000000199
- 412 14. Lee KS, Song EK, Lennie TA, et al. Symptom clusters in men and women with heart  
413 failure and their impact on cardiac event-free survival. *J Cardiovasc Nurs*.  
414 2010;25(4):263-272. doi:10.1097/JCN.0b013e3181cfbb88
- 415 15. Salyer J, Flattery M, Lyon DE. Heart failure symptom clusters and quality of life. *Hear*  
416 *Lung*. 2019;48(5):366-372. doi:10.1016/j.hrtlng.2019.05.016
- 417 16. Zhang J, Hobkirk J, Carroll S, Pellicori P, Clark AL, Cleland JGF. Exploring quality of  
418 life in patients with and without heart failure. *Int J Cardiol*. 2016;202:676-684.  
419 doi:10.1016/j.ijcard.2015.09.076
- 420 17. Locatelli G, Iovino P, Pasta A, Jurgens CY, Vellone E, Riegel B. Cluster analysis of heart

- 421 failure patients based on their psychological and physical symptoms and predictive  
422 analysis of cluster membership. *J Adv Nurs*. 2023. doi:10.1111/jan.15890 [Epub ahead of  
423 print]
- 424 18. Wallace RB, Herzog AR. Overview of the Health Measures in the Health and Retirement  
425 Study. *J Hum Resour*. 1995;30(1):S84-S107.
- 426 19. Khan SS, Ning H, Wilkins JT, et al. Association of Body Mass Index With Lifetime Risk  
427 of Cardiovascular Disease and Compression of Morbidity. *JAMA Cardiol*.  
428 2018;3(4):280-287. doi:10.1001/jamacardio.2018.0022
- 429 20. Covinsky KE, Lindquist K, Dunlop DD, Yelin E. Pain, functional limitations, and aging. *J*  
430 *Am Geriatr Soc*. 2009;57(9):1556-1561. doi:10.1111/j.1532-5415.2009.02388.x
- 431 21. Hu Y, Jiang J, Xu L, et al. Symptom clusters and quality of life among patients with  
432 chronic heart failure: A cross-sectional study. *Jpn J Nurs Sci*. 2021;(1):e12366-n/a.
- 433 22. Steffick DE, Wallace RB, Regula A, et al. HRS/AHEAD Documentation Report  
434 Documentation of Affective Functioning Measures in the Health and Retirement Study.  
435 2000.
- 436 23. Lanza ST, Collins LM. A new SAS procedure for latent transition analysis: transitions in  
437 dating and sexual risk behavior. *Dev Psychol*. 2008;44(2):446-456. doi:10.1037/0012-  
438 1649.44.2.446
- 439 24. Lanza ST, Collins LM, Lemmon DR, Schafer JL. PROC LCA: A SAS Procedure for  
440 Latent Class Analysis. *Struct Equ Modeling*. 2007;14(4):671-694.  
441 doi:10.1080/10705510701575602
- 442 25. Lanza, S.T., Dziak, J.J., Huang, L., Wagner, A., & Collins LM. PROC LCA & PROC  
443 LTA (version 1.3.2). Coll Park. 2015:PA: Methodology Center, The Pennsylvania State

- 444 Uni.
- 445 26. Faulkner KM, Jurgens CY, Denfeld QE, Lyons KS, Harman Thompson J, Lee CS.  
446 Identifying unique profiles of perceived dyspnea burden in heart failure. *Hear lung*.  
447 2020;49(5):488-494.
- 448 27. Herr JK, Salyer J, Flattery M, et al. Heart failure symptom clusters and functional status -  
449 a cross-sectional study. *J Adv Nurs*. 2015;71(6):1274-1287. doi:10.1111/jan.12596
- 450 28. Ramalho SHR, Shah AM. Lung function and cardiovascular disease: A link. *Trends*  
451 *Cardiovasc Med*. 2021;31(2):93-98. doi:10.1016/j.tcm.2019.12.009
- 452 29. Jurgens CY, Moser DK, Armola R, Carlson B, Sethares K, Riegel B. Symptom clusters of  
453 heart failure. *Res Nurs Heal*. 2009;32(5):551-560. doi:10.1002/nur.20343
- 454 30. Li Z, Zhao H, Wang J. Metabolism and Chronic Inflammation: The Links Between  
455 Chronic Heart Failure and Comorbidities. *Front Cardiovasc Med*. 2021;8:650278.  
456 doi:10.3389/fcvm.2021.650278
- 457 31. Lin Y, Fu S, Yao Y, Li Y, Zhao Y, Luo L. Heart failure with preserved ejection fraction  
458 based on aging and comorbidities. *J Transl Med*. 2021;19(1):291. doi:10.1186/s12967-  
459 021-02935-x
- 460 32. Boakye EA, Buchanan P, Wang J, Stringer L, Geneus C, Scherrer JF. Self-Reported  
461 Lifetime Depression and Current Mental Distress Among Veterans Across Service Eras.  
462 *Mil Med*. 2017;182(3-4):e1691-e1696. doi:10.7205/MILMED-D-16-00119
- 463 33. Gould CE, Rideaux T, Spira AP, Beaudreau SA. Depression and anxiety symptoms in  
464 male veterans and non-veterans: the Health and Retirement Study. *Int J Geriatr Psychiatry*.  
465 2015;30(6):623-630. doi:10.1002/gps.4193
- 466 34. Tanielian T, Jaycox LH, Schell TL, et al. Invisible Wounds: Mental Health and Cognitive

- 467 Care Needs of America's Returning Veterans. Santa Monica, CA: RAND Corporation;  
468 2008. doi:10.7249/RB9336
- 469 35. Andersson C, Schou M, Gustafsson F, Torp-Pedersen C. Alcohol Intake in Patients With  
470 Cardiomyopathy and Heart Failure: Consensus and Controversy. *Circ Heart Fail*.  
471 2022;15(8):e009459. doi:10.1161/CIRCHEARTFAILURE.121.009459
- 472 36. Chiva-Blanch G, Badimon L. Benefits and Risks of Moderate Alcohol Consumption on  
473 Cardiovascular Disease: Current Findings and Controversies. *Nutrients*. 2019;12(1).  
474 doi:10.3390/nu12010108
- 475 37. Giosuè A, Calabrese I, Vitale M, Riccardi G, Vaccaro O. Consumption of Dairy Foods  
476 and Cardiovascular Disease: A Systematic Review. *Nutrients*. 2022;14(4).  
477 doi:10.3390/nu14040831
- 478 38. Piano MR. Alcohol's Effects on the Cardiovascular System. *Alcohol Res*.  
479 2017;38(2):219-241.
- 480 39. Celano CM, Villegas AC, Albanese AM, Gaggin HK, Huffman JC. Depression and  
481 Anxiety in Heart Failure: A Review. *Harv Rev Psychiatry*. 2018;26(4):175-184.  
482 doi:10.1097/HRP.0000000000000162
- 483 40. Dickson VV, Melkus GDE, Katz S, et al. Building skill in heart failure self-care among  
484 community dwelling older adults: Results of a pilot study. *Patient Educ Couns*.  
485 2014;96(2):188-196. doi:10.1016/j.pec.2014.04.018
- 486 41. Hossein Pour AH, Gholami M, Saki M, Birjandi M. The effect of inspiratory muscle  
487 training on fatigue and dyspnea in patients with heart failure: A randomized, controlled  
488 trial. *Jpn J Nurs Sci*. 2020;17(2):e12290-n/a.
- 489 42. Caggianelli G, Iovino P, Rebora P, et al. A Motivational Interviewing Intervention

- 490 Improves Physical Symptoms in Patients with Heart Failure: A Secondary Outcome  
491 Analysis of the Motivate-HF Randomized Controlled Trial. *J Pain Symptom Manage.*  
492 2022;63(2):221-229.e1. doi:10.1016/j.jpainsymman.2021.09.006
- 493 43. Zhao Q, Liu X, Wan X, et al. Non-Pharmacological Interventions For Cognitive  
494 Impairment In Older Adults With Heart Failure: A Systematic Review. *Geriatr Nurs.*  
495 2023;51:378-387. doi:10.1016/j.gerinurse.2023.04.008
- 496 44. Redeker NS, Jeon S, Muench U, Campbell D, Walsleben J, Rapoport DM. Insomnia  
497 Symptoms and Daytime Function in Stable Heart Failure. *Sleep.* 2010;33(9):1210-1216.  
498 doi:10.1093/sleep/33.9.1210
- 499  
500  
501



502 **Table 1.** Demographic characteristics (N=690)

| <b>Variables</b>                                         | <b>Mean (SD)/N (%)</b> |
|----------------------------------------------------------|------------------------|
| <b>Age</b>                                               | 74.9 (10.0)            |
| <b>Gender</b>                                            |                        |
| Male                                                     | 300 (43.5)             |
| Female                                                   | 390 (56.5)             |
| <b>Race</b>                                              |                        |
| White/                                                   | 551 (79.8)             |
| Black/African American                                   | 113 (16.4)             |
| Other/don't know                                         | 26 (3.8)               |
| <b>BMI</b>                                               |                        |
| Under weight (<18.5)                                     | 35 (5.07)              |
| Normal weight (18.5-24.9)                                | 191 (27.7)             |
| Overweight (25.0-29.9)                                   | 192 (27.8)             |
| Obesity (30.0-39.9)                                      | 209 (30.3)             |
| Morbid obesity (>=40.0)                                  | 63 (9.1)               |
| <b>Marital Status</b>                                    |                        |
| Married/partnered                                        | 335 (48.6)             |
| Single                                                   | 355 (51.4)             |
| <b>Education</b>                                         |                        |
| High school or less                                      | 492 (71.3)             |
| College degree/some college                              | 114 (16.5)             |
| Graduate school                                          | 84 (12.2)              |
| <b>Veterans status</b>                                   |                        |
| Yes                                                      | 180 (26.1)             |
| No                                                       | 510 (73.9)             |
| <b>Smoking status</b>                                    |                        |
| Yes                                                      | 66 (9.6)               |
| No                                                       | 624 (90.4)             |
| <b>Alcohol consumption</b>                               |                        |
| Yes                                                      | 179 (25.9)             |
| No                                                       | 511 (74.1)             |
| <b>Alcohol consumption (number days per week) N=179</b>  | 2.1 (2.5)              |
| <b>Alcohol consumption (number drinks per day) N=103</b> | 1.7 (0.9)              |
| <b>Alcohol consumption (binge drinking) N=103</b>        | 1.1 (3.2)              |
| <b>Hypertension</b>                                      |                        |
| Yes                                                      | 580 (84.1)             |
| No                                                       | 110 (15.9)             |
| <b>Diabetes</b>                                          |                        |
| Yes                                                      | 319 (46.2)             |
| No                                                       | 371 (53.8)             |

| <b>Variables</b>    | <b>Mean (SD)/N (%)</b> |
|---------------------|------------------------|
| <b>Cancer</b>       |                        |
| Yes                 | 142 (20.6)             |
| No                  | 548 (79.4)             |
| <b>Lung disease</b> |                        |
| Yes                 | 232 (33.6)             |
| No                  | 458 (66.4)             |
| <b>Arthritis</b>    |                        |
| Yes                 | 548 (79.4)             |
| No                  | 142 (20.6)             |

503

504

505

506

507

508

509

510

511

512

513

514

515 **Table 2.** Descriptive statistics of symptoms among older adults with heart failure (N=690)

| Indicator of Latent Status | n, %       | Chi-square |                     |         |                    |           |
|----------------------------|------------|------------|---------------------|---------|--------------------|-----------|
|                            |            | Swelling   | Shortness of breath | Fatigue | Depressive symptom | Dizziness |
| <b>Pain</b>                |            |            |                     |         |                    |           |
| Yes                        | 376 (54.5) | **0.24     | **0.20              | **0.30  | **0.15             | **0.23    |
| No                         | 314 (45.5) |            |                     |         |                    |           |
| <b>Persistent swelling</b> |            |            |                     |         |                    |           |
| Yes                        | 381 (55.2) | ---        | **0.27              | **0.21  | **0.17             | **0.17    |
| No                         | 309 (44.8) |            |                     |         |                    |           |
| <b>Shortness of breath</b> |            |            |                     |         |                    |           |
| Yes                        | 419 (60.7) | ---        | ---                 | **0.34  | **0.17             | **0.18    |
| No                         | 271 (39.3) |            |                     |         |                    |           |
| <b>Fatigue</b>             |            |            |                     |         |                    |           |
| Yes                        | 332 (48.1) | ---        | ---                 | ---     | **0.28             | **0.28    |
| No                         | 358 (51.9) |            |                     |         |                    |           |
| <b>Depressive symptoms</b> |            |            |                     |         |                    |           |
| Yes                        | 407 (67.1) | ---        | ---                 | ---     | ---                | **0.14    |
| No                         | 200 (32.9) |            |                     |         |                    |           |
| <b>Dizziness</b>           |            |            |                     |         |                    |           |
| Yes                        | 213 (30.9) | ---        | ---                 | ---     | ---                | ---       |
| No                         | 477 (69.1) |            |                     |         |                    |           |

516 *Note.* \* $p < .05$ ; \*\* $p < .001$ .

517

518 **Table 3.** Latent analysis fit statistics (N=690)

| Number of statuses | Likelihood Ratio $G^2$ | Degree of Freedom | AIC          | BIC           | cAIC          | Adj.BIC       |
|--------------------|------------------------|-------------------|--------------|---------------|---------------|---------------|
| 2                  | 71.97                  | 50                | 97.97        | 156.95        | 169.95        | 115.67        |
| <b>3</b>           | <b>52.25</b>           | <b>43</b>         | <b>92.25</b> | <b>182.99</b> | <b>202.99</b> | <b>119.48</b> |
| 4                  | 40.2                   | 36                | 94.02        | 216.51        | 243.51        | 130.78        |
| 5                  | 26.27                  | 29                | 94.27        | 248.52        | 282.52        | 140.56        |

519 *Note.* Boldface values indicate the selected model for this study; AIC=Akaike's information  
520 criterion; BIC=Bayesian information criterion. cAIC = consistent Akaike's information criterion;  
521 Adj.BIC = Adjusted Bayesian information criterion  
522

523 **Table 4.** Probabilities of symptoms in each profile-membership from latent class model (N=690)

| Symptoms            | Profile 1<br>(High-burden)<br>N=206 (29.86%) | Profile 2<br>(Low-burden)<br>N=117 (16.96%) | Profile 3<br>(Cardiopulmonary-depressive)<br>N=367 (53.19%) |
|---------------------|----------------------------------------------|---------------------------------------------|-------------------------------------------------------------|
| Pain                | <b>0.85</b>                                  | 0.07                                        | 0.00                                                        |
| Swelling            | <b>0.80</b>                                  | 0.17                                        | <b>0.74</b>                                                 |
| Shortness of breath | <b>0.88</b>                                  | 0.05                                        | <b>1.00</b>                                                 |
| Fatigue             | <b>0.87</b>                                  | 0.00                                        | 0.38                                                        |
| Depressive symptoms | <b>0.87</b>                                  | 0.38                                        | <b>0.81</b>                                                 |
| Dizziness           | <b>0.68</b>                                  | 0.06                                        | 0.00                                                        |

524 *Note.* Boldface values indicate symptoms that characterize cluster profile

525

526

527 **Table 5.** Comparison of the three symptom cluster profiles on demographic and clinical (N=690)

| <b>Variables</b>                                       | <b>Profile 1<br/>All-high<br/>(N=206)</b> | <b>Profile 2<br/>All-low<br/>(N=117)</b> | <b>Profile 3<br/>Cardiopulmonary-<br/>depressive<br/>(N=367)</b> | <b>Differences<br/>P-value</b> |
|--------------------------------------------------------|-------------------------------------------|------------------------------------------|------------------------------------------------------------------|--------------------------------|
| <b>Age (years)</b>                                     | 72.2±9.9                                  | 75.1±9.7                                 | 76.4±10.0                                                        | **<.001                        |
| <b>Gender</b>                                          |                                           |                                          |                                                                  | *0.01                          |
| Male                                                   | 71 (34.5%)                                | 59 (50.4%)                               | 170 (46.3%)                                                      |                                |
| Female                                                 | 135 (65.5%)                               | 58 (49.6%)                               | 197 (53.7%)                                                      |                                |
| <b>Race</b>                                            |                                           |                                          |                                                                  | 0.37                           |
| White/Caucasian                                        | 159 (77.1%)                               | 95 (81.2%)                               | 297 (80.9%)                                                      |                                |
| Black/African American                                 | 35 (16.9%)                                | 20 (17.1%)                               | 58 (15.8%)                                                       |                                |
| Other/don't know                                       | 12 (5.8%)                                 | 2 (1.7%)                                 | 12 (3.3%)                                                        |                                |
| <b>BMI</b>                                             |                                           |                                          |                                                                  | **<.001                        |
| Under weight (<18.5)                                   | 8 (3.9%)                                  | 5 (4.3%)                                 | 22 (5.9%)                                                        |                                |
| Normal weight (18.5-24.9)                              | 40 (19.4%)                                | 30 (25.5%)                               | 121 (32.9%)                                                      |                                |
| Overweight (25.0-29.9)                                 | 53 (25.7%)                                | 44 (37.6%)                               | 95 (25.9%)                                                       |                                |
| Obesity (30.0-39.9)                                    | 75 (36.4%)                                | 30 (25.6%)                               | 104 (28.3%)                                                      |                                |
| Morbid obesity (>=40.0)                                | 30 (14.6%)                                | 8 (6.8%)                                 | 25 (6.8%)                                                        |                                |
| <b>Marital status</b>                                  |                                           |                                          |                                                                  | *0.03                          |
| Married and partner                                    | 90 (43.7%)                                | 69 (58.9%)                               | 176 (47.9%)                                                      |                                |
| Others                                                 | 116 (56.3%)                               | 48 (41.0%)                               | 191 (52.0%)                                                      |                                |
| <b>Education</b>                                       |                                           |                                          |                                                                  | 0.05                           |
| High school or less                                    | 160 (77.7%)                               | 78 (66.7%)                               | 254 (69.3%)                                                      |                                |
| College and above                                      | 46 (22.3%)                                | 39 (33.3%)                               | 113 (30.7%)                                                      |                                |
| <b>Veteran Status</b>                                  |                                           |                                          |                                                                  | *0.03                          |
| Yes                                                    | 41 (19.9%)                                | 38 (32.5%)                               | 101 (27.5%)                                                      |                                |
| No                                                     | 165 (80.1%)                               | 79 (67.5%)                               | 266 (72.5%)                                                      |                                |
| <b>Smoking status</b>                                  |                                           |                                          |                                                                  | 0.93                           |
| Yes                                                    | 21 (10.1%)                                | 11 (9.4%)                                | 34 (9.3%)                                                        |                                |
| No                                                     | 185 (89.8%)                               | 106 (90.6%)                              | 333 (90.7%)                                                      |                                |
| <b>Alcohol Consumption</b>                             |                                           |                                          |                                                                  | **<.001                        |
| Yes                                                    | 38 (18.5%)                                | 52 (44.4%)                               | 89 (24.3%)                                                       |                                |
| No                                                     | 168 (81.6%)                               | 65 (55.6%)                               | 278 (75.8%)                                                      |                                |
| <b>Alcohol consumption<br/>(number days per week)</b>  | 1.7±2.4                                   | 1.9±2.3                                  | 2.3±2.7                                                          | 0.35                           |
| <b>Alcohol consumption<br/>(number drinks per day)</b> | 1.9±1.2                                   | 1.5±0.8                                  | 1.8±0.9                                                          | 0.24                           |
| <b>Alcohol consumption<br/>(binge drinking)</b>        | 1.9±5.8                                   | 0.5±1.4                                  | 1.1±2.8                                                          | 0.29                           |

| <b>Variables</b>    | <b>Profile 1<br/>All-high<br/>(N=206)</b> | <b>Profile 2<br/>All-low<br/>(N=117)</b> | <b>Profile 3<br/>Cardiopulmonary-<br/>depressive<br/>(N=367)</b> | <b>Differences<br/>P-value</b> |
|---------------------|-------------------------------------------|------------------------------------------|------------------------------------------------------------------|--------------------------------|
| <b>Hypertension</b> |                                           |                                          |                                                                  | 0.08                           |
| Yes                 | 183 (88.8%)                               | 96 (82.1%)                               | 301 (82.0%)                                                      |                                |
| No                  | 23 (11.2%)                                | 21 (178.0%)                              | 66 (18.0%)                                                       |                                |
| <b>Diabetes</b>     |                                           |                                          |                                                                  | *0.01                          |
| Yes                 | 115 (55.8%)                               | 49 (41.9%)                               | 155 (42.2%)                                                      |                                |
| No                  | 91 (44.2%)                                | 68 (58.1%)                               | 212 (57.8%)                                                      |                                |
| <b>Cancer</b>       |                                           |                                          |                                                                  | 0.11                           |
| Yes                 | 52 (25.2%)                                | 19 (16.2%)                               | 71 (19.4%)                                                       |                                |
| No                  | 154 (74.8%)                               | 98 (83.8%)                               | 296 (80.6%)                                                      |                                |
| <b>Lung disease</b> |                                           |                                          |                                                                  | **<.001                        |
| Yes                 | 110 (53.4%)                               | 18 (15.4%)                               | 104 (28.3%)                                                      |                                |
| No                  | 96 (46.6%)                                | 99 (84.6%)                               | 263 (71.7%)                                                      |                                |
| <b>Arthritis</b>    |                                           |                                          |                                                                  | **<.001                        |
| Yes                 | 183 (88.8%)                               | 79 (67.5%)                               | 286 (77.9%)                                                      |                                |
| No                  | 23 (11.2%)                                | 38 (32.5%)                               | 81 (22.1%)                                                       |                                |

*Note:* \* $p < .05$ ; \*\* $p < .001$ .

528

529

530 **Table 6.** Multinomial logistic model

|                     | <b>Profile 1 vs. 2</b> |                        | <b>Profile 3 vs. 2</b> |                        | <b>p-value</b> |
|---------------------|------------------------|------------------------|------------------------|------------------------|----------------|
|                     | Coefficient            | Odds Ratio<br>(95% CI) | Coefficient            | Odds Ratio<br>(95% CI) |                |
| Alcohol consumption | 0.29                   | 0.17-0.50              | 0.44                   | 0.28-0.69              | <.001          |
| Lung disease        | 5.08                   | 2.81-9.18              | 1.85                   | 1.05-3.25              | <.001          |
| Arthritis           | 2.76                   | 1.47-5.19              | 1.40                   | 0.86-2.28              | 0.01           |

531 *Note:* CI=Confidence Interval

532



533 **FIGURE LENGENDS**

534

535 **Figure 1.** Symptom cluster profiles of latent classes

536

537

538

539

540

541

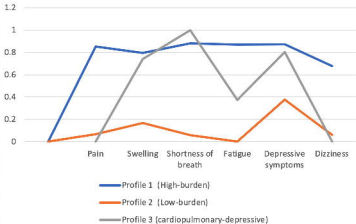

Source: https://medrxiv.org/content/medrxiv/early/2024/07/26/2024.07.25.24309835.full.pdf
